# Supplementary material for: Household Air Pollution: Sources and Exposure Levels to Fine Particulate Matter in Nairobi Slums
Source: MDPI journal article supplement (doi:10.3390/toxics4030012), 2016-07-13
Supplement: s1 [file s1]

# Supplementary Materials: Household Air Pollution: Sources and Exposure Levels to Fine Particulate Matter in Nairobi Slums

Kanyiva Muindi, Elizabeth Kimani-Murage, Thaddaeus Egondi, Joacim Rocklov and Nawi Ng

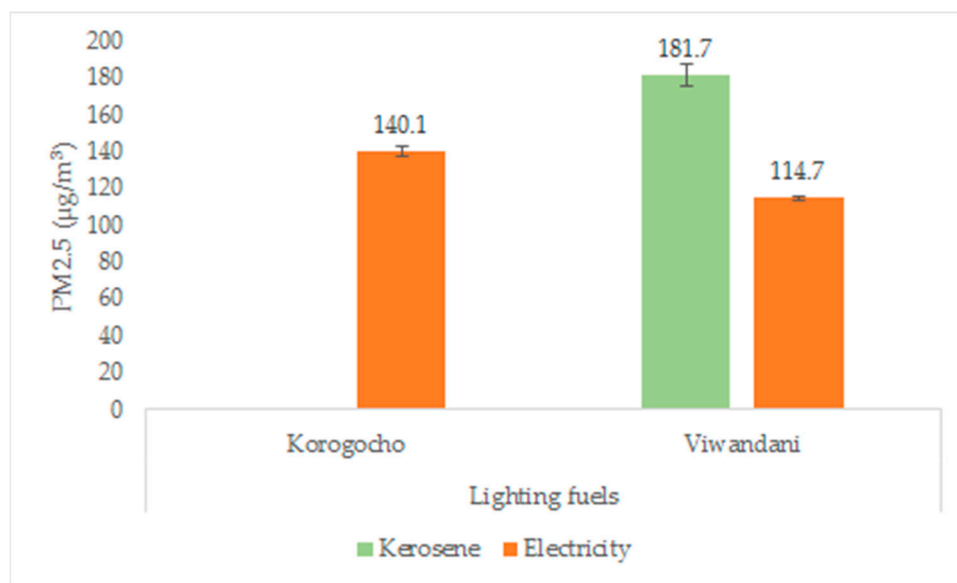

**Figure S1.** Mean PM<sub>2.5</sub> levels associated with household lighting fuels.

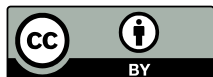

© 2016 by the authors. Submitted for possible open access publication under the terms and conditions of the Creative Commons Attribution (CC-BY) license (<http://creativecommons.org/licenses/by/4.0/>).
